# Supplementary material
Source: publisher figshare collection journal article supplement (https://future-science-group.figshare.com/ndownloader/files/33551207)
Supplement: Supplementary file 1 [file 33551207]

**Supplementary Appendix**

**Heterogeneity analyses**

- **ECOG-PS 0**

Q=0.14; df=3; I2=0%

- **ECOG-PS 1**

Q=4.04; df=5; I2=0%

- **AGE < 65**

Q=3.13; df=4; I2=0%

- **AGE ≥ 65**

Q=2.67; df=4; I2=0%

- **MALE PATIENTS**

Q=3.23; df=4; I2=0%

- **FEMALE PATIENTS**

Q=0.95; df=4; I2=0%

- **LIVER METASTASES**

Q=3.50; df=2; I2=42.79%

- **NO LIVER METASTASES**

Q=0.57; df=2; I2=0%

- **UROTHELIAL TRANSITIONAL HISTOLOGY**

Q=0.34; df=1; I2=0%

- **MIXED HISTOLOGY**

Q=0.57; df=1; I2=0%
